# Supplementary material for: Cucurbit[7]uril inclusion complexation as a supramolecular strategy for color stabilization of anthocyanin model compounds
Source: Royal Society of Chemistry journal article supplement (doi:10.1039/c6pp00060f), 2016-04-22
Supplement: c6pp00060f1.pdf [file c6pp00060f1.pdf]

## Electronic Supporting Information

### Cucurbit[7]uril Inclusion Complexation as a Supramolecular Strategy for Color Stabilization of Anthocyanin Model Compounds

Barbara Held,<sup>a</sup> Hao Tang,<sup>b</sup> Palani Natarajan,<sup>b</sup> Cassio Pacheco da Silva,<sup>a</sup> Volnir de Oliveira Silva,<sup>a</sup>  
Cornelia Bohne\*<sup>a</sup> and Frank H. Quina\*<sup>b</sup>

<sup>a</sup>, Instituto de Química, Universidade de São Paulo, C.P. 26077, São Paulo 05513-970, Brasil

<sup>b</sup>, Department of Chemistry, University of Victoria, PO Box 3065, Victoria, BC, Canada V8W 3V6

#### Index

|                                                                      |    |
|----------------------------------------------------------------------|----|
| Synthesis                                                            | S2 |
| Fig. S1                                                              | S2 |
| Fig. S2                                                              | S3 |
| Fitting of binding isotherms                                         | S4 |
| Determination of the apparent hydration constant for Fl <sup>+</sup> | S5 |
| Stabilization of Fl <sup>+</sup> in the presence of CB[7]            | S6 |
| Fig. S3                                                              | S6 |
| Fig. S4                                                              | S7 |
| Fig. S5                                                              | S7 |
| Binding isotherms of B-TMF and MMF <sup>+</sup> with CB[7]           | S8 |
| Fig. S6                                                              | S8 |
| Fig. S7                                                              | S9 |
| References                                                           | S9 |

## Synthesis.

MMF<sup>+</sup> was synthesized as previously described.<sup>1</sup> B-TMF was synthesized based on previous literature<sup>2, 3</sup> by the condensation reaction between equimolar quantities (0.65 mmol) of 2-hydroxy-4-methoxy-benzaldehyde and 3,4-dimethoxy-acetophenone dissolved in glacial acetic acid (10 mL) in a round bottom flask. All chemicals used were reagent grade and the reaction was carried out under constant stirring at room temperature. Dry gaseous HCl (generated from sulfuric acid and NaCl) was bubbled into the reaction flask throughout the reaction and the progress of the reaction was followed by color changes from yellow to intense red until no further color change was observed. Diethyl ether (15 mL) was added to the reaction mixture to precipitate the product, which was filtered and washed with diethyl ether (2 x 5 mL). Yield: 87 mg (35%), <sup>1</sup>H NMR (500 MHz, CD<sub>3</sub>OD) δ/ppm: 4.05 (s, 3H), 4.06 (s, 3H), 4.18 (s, 3H), 7.34 (d, *J* = 8.7 Hz, 1H), 7.55 (dd, *J* = 9.0, 2.4 Hz, 1H), 7.92-7.93 (m, 1H), 8.02 (d, *J* = 2.3 Hz, 1H), 8.20 (d, *J* = 9.0 Hz, 1H), 8.29 (dd, *J* = 8.7, 2.3 Hz, 1H), 8.52 (d, *J* = 8.8 Hz, 1H), 9.16 (d, *J* = 8.8 Hz, 1H). <sup>13</sup>C NMR (125 MHz, CH<sub>3</sub>OD) δ/ppm: 57.0, 57.3, 58.1, 101.7, 112.3, 113.7, 115.0, 122.8, 127.7, 133.1, 154.8; some non-hydrogenated carbons were not detected. HRMS (ESI in methanol, positive mode) *m/z*: calcd for C<sub>18</sub>H<sub>17</sub>O<sub>4</sub> 297.112135 found: 297.1136. El. Anal. C<sub>18</sub>H<sub>17</sub>O<sub>4</sub>Cl·3 H<sub>2</sub>O: calculated/%: C 55.89, H 5.99; found/%: C 56.07, H 5.92.

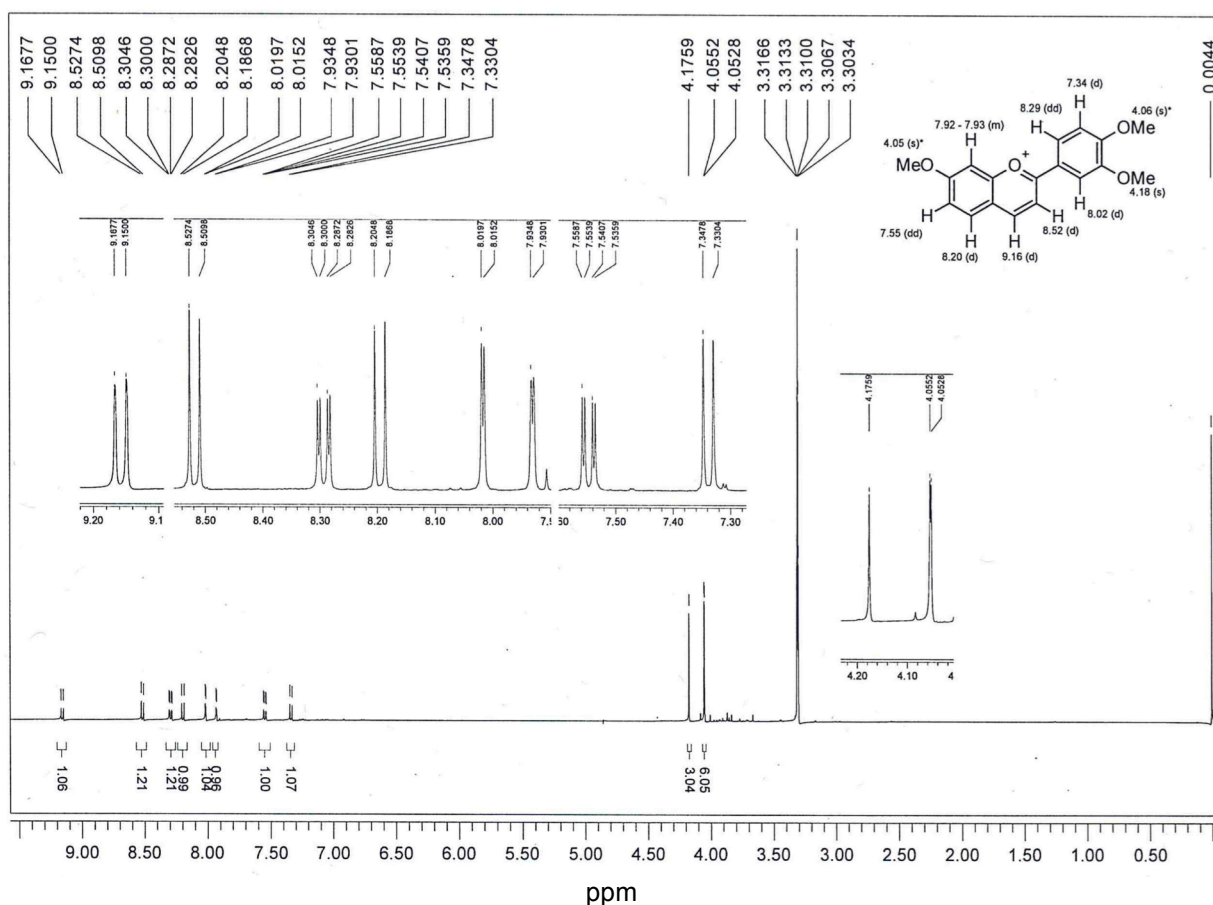

**Figure S1.** <sup>1</sup>H NMR of B-TMF in CH<sub>3</sub>OD (500 MHz). Assignment of the two peaks denoted as \* is ambiguous.

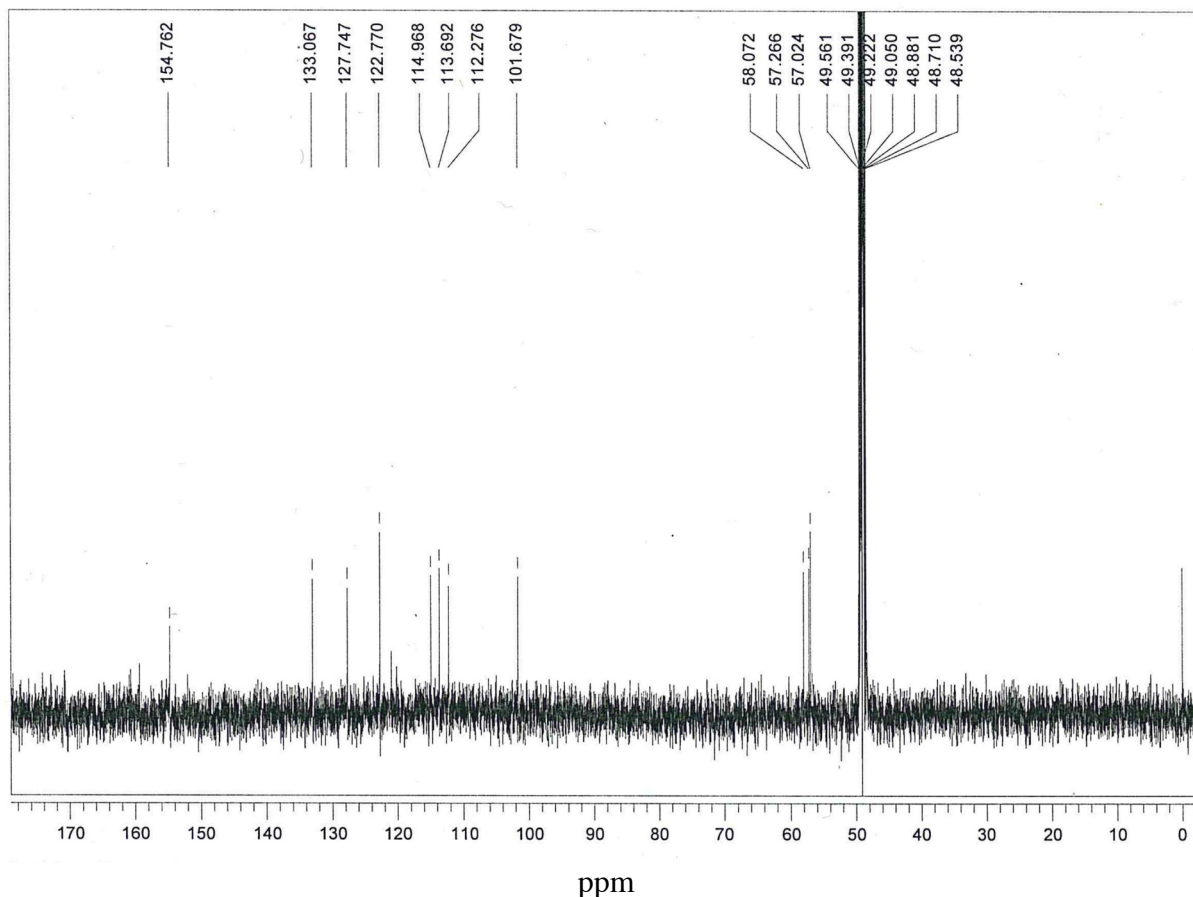

**Figure S2.**  $^{13}\text{C}$  NMR spectra of B-TMF in  $\text{CH}_3\text{OD}$  (125 MHz).

CB[7] was synthesized using a modified procedure based on previous reports.<sup>4-6</sup> All chemicals used in the synthesis were reagent grade. The modified procedure is the following: Glycoluril (10.0 g, 70.4 mmol, 1.0 eq.) and powdered paraformaldehyde (4.0 g, 133.3 mmol, 1.9 eq.) were added to a 100 mL two-necked round bottom flask. A volume of 20 mL of 20% (v/v)  $\text{H}_2\text{SO}_4$  (95-95%) in  $\text{HCl}$  (36-38%) was added to the flask and the solution was stirred vigorously until a gel formed. The reaction was heated at  $80^\circ\text{C}$  for 3 h followed by 5 h heating at  $95\text{-}105^\circ\text{C}$ . The homogenous solution was cooled to RT and was then poured into 150 mL of methanol. The resulting suspension was stirred further followed by the gradual addition of water (100-120 mL). After water addition the suspension was stirred overnight and then filtered. The filtrate was precipitated with methanol (150 mL), the suspension was filtered and the solid was washed with methanol. This solid was dissolved in water and re-precipitated with methanol to remove mineral acids. The solid obtained from the latter step was dissolved in 20% aqueous glycerol (1.0 g solid: 19 mL water:glycerol) and was heated under stirring for 5 h at  $70\text{-}80^\circ\text{C}$ . Insoluble material was removed by filtration. Methanol was added to the filtrate to precipitate CB[5] and CB[7]. Separation of CB[5] from CB[7] was achieved by repeated re-precipitation from water/methanol (1g solid:16-18 mL water:2-3 mL methanol). If any CB[6] was shown to be present (by ESI-MS) then 1.6 g of solid was dissolved in 30 mL water through which a 1:1 methanol:acetone mixture was diffused for 3-4 h. The turbid solution was filtered. Methanol was added to the filtrate leading to the precipitation of CB[7]. Final removal of small amounts of CB[5] was achieved by refluxing 1.1 g of solid dissolved in a water methanol mixture (1:1, 75 mL) for 10 h. The

resultant suspension was cooled to RT, filtered and washed with methanol. The solid was dried under vacuum for 12 h at 80 °C. CB[7] was characterized by <sup>13</sup>C NMR and ESI-MS based on literature data.<sup>4</sup> An aqueous sample of CB[7] was titrated by measuring the changes in the absorbance of the cobaltocenium cation at 261 nm ( $\epsilon_{261} = 34,200 \text{ M}^{-1} \text{ cm}^{-1}$  for Cob<sup>+</sup>),<sup>7</sup> and a purity of 95% for CB[7] was established right after drying the sample under vacuum. Solid CB[7] absorbs water over time and CB[7] stock solutions were regularly titrated with the cobaltocenium ion to establish the actual CB[7] concentration prior to performing quantitative experiments.

### Fitting of binding isotherms.

The fluorescence intensity of the guest Fl<sup>+</sup> at various CB[7] concentrations was determined by integration of the corrected emission spectra between 500 and 700 nm, while for MMF<sup>+</sup> the spectra were integrated between 430 and 650 nm. The guest and CB[7] concentrations were corrected for dilution before the data were fit using the Scientist 3 program. Numerical fits were employed for 1:1 or 1:2 (guest:CB[7]) binding models, where the definitions for the total concentration of B-TMF and MMF<sup>+</sup> are different because of the hydration of Fl<sup>+</sup> in the case of B-TMF and no such reaction in the case of MMF<sup>+</sup>.

*1:1 binding model:* The definitions of terms are:

$K_{ap}$  = equilibrium constant between Fl<sup>+</sup> and the sum of B, C<sub>Z</sub> and C<sub>E</sub>. This parameter is not used in the case of MMF<sup>+</sup>.

$K_{11}$  = 1:1 equilibrium constant

[G] = free Fl<sup>+</sup> or MMF<sup>+</sup> concentration

[G]<sub>T</sub> = total concentration of B-TMF or MMF<sup>+</sup>

[CB] = free CB[7] concentration

[CB]<sub>T</sub> = total concentration of CB[7]

[G@CB] = concentration of 1:1 complex

$\Phi_f$  = emission quantum yield for G

$\Phi_1$  = emission quantum yield for G@CB

$I$  = fluorescence intensity (experimental observable)

The equations used for the fit are:

$$I = \Phi_f [G] + \Phi_1 [G@CB] \quad (S1)$$

$$K_{11} [G] [CB] = [G@CB] \quad (S2)$$

$$[G]_T = [G] + [G@CB] + [G]/K_{ap} \quad (S3)$$

$$\text{In the case of MMF}^+: [G]_T = [G] + [G@CB] \quad (S3a)$$

$$[CB]_T = [CB] + [G@CB] \quad (S4)$$

*1:2 binding model:* Additional definitions of terms are:

$K_{12}$  = 1:2 equilibrium constant

[G@CB<sub>2</sub>] = concentration of 1:2 complex

$\Phi_2$  = emission quantum yield for G@CB<sub>2</sub>

The equations used for the fit are:

$$I = \Phi_f [G] + \Phi_1 [G@CB] + \Phi_2 [G@CB_2] \quad (S5)$$

$$K_{11} [G] [CB] = [G@CB] \quad (S2)$$

$$K_{12} [G@CB] [CB] = [G@CB_2] \quad (S6)$$

$$[G]_T = [G] + [G@CB] + [G@CB_2] + [G]/K_{ap} \quad (S7)$$

$$\text{In the case of MMF}^+: [G]_T = [G] + [G@CB] + [G@CB_2] \quad (S7a)$$

$$[CB]_T = [CB] + [G@CB] + 2[G@CB_2] \quad (S8)$$

### Determination of the apparent hydration constant for Fl<sup>+</sup>

Fl<sup>+</sup> is colored and has an absorption maximum at 470 nm, while the other species (B, C<sub>z</sub>, C<sub>E</sub>) are colorless and have absorption maxima around 380 nm. The equilibrium between Fl<sup>+</sup> and the sum of the hydrated form B and the chalcones (C<sub>z</sub> and C<sub>E</sub>) (eq. S9 where Z = B + C<sub>z</sub> + C<sub>E</sub>) corresponds to an apparent pK value (pK<sub>ap</sub>) defined by K<sub>ap</sub> (eq. S10).

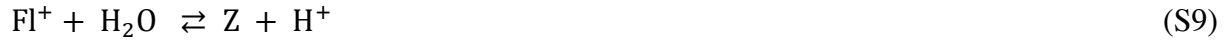

$$K_{ap} = \frac{[Z] [H^+]}{[\text{Fl}^+]} \quad (S10)$$

Absorption spectra for B-TMF were determined at different pH values. The absorbance at low pH values corresponds to the absorbance of Fl<sup>+</sup> only, while at pH 6.04 only the species in Z were present. The relative mole fraction of Fl<sup>+</sup> at different pH values was calculated from the absorbance at 470 nm at each pH (A) and the absorbance at the lowest pH (A<sub>low</sub>) and the highest pH (A<sub>high</sub>) employed (eq. S11).

$$x_{\text{Fl}} = \frac{A - A_{\text{high}}}{A_{\text{low}} - A_{\text{high}}} \quad (S11)$$

The relationship between the molar fraction of Fl<sup>+</sup> and pH is given by:

$$\log\left(\frac{x_{\text{Fl}}}{1 - x_{\text{Fl}}}\right) = \text{p}K_{ap} - \text{pH} \quad (S12)$$

The dependence of log (x<sub>Fl</sub>/(1 - x<sub>Fl</sub>)) with pH was fit to a linear function (eq. S12). For the data collected after 24 h, the slope was -1.02 ± 0.07 and the intercept was 3.1 ± 0.2 (Fig. 1 in the paper). The value of pK<sub>ap</sub> calculated from the slope and intercept is 3.0 ± 0.3 (at the pK<sub>a</sub>, the value of log (x<sub>Fl</sub>/(1 - x<sub>Fl</sub>)) is zero). The data collected after 2 h led to a slope and intercept of -0.8 ± 0.1 and 2.5 ± 0.3, leading to a pK<sub>ap</sub> value of 3.1 ± 0.5. The pK<sub>ap</sub> value recovered from the spectra collected after 2 h is within the experimental error of the value collected after 24 h. This result indicates that the contribution of C<sub>E</sub> to the total equilibrium was small. A pK<sub>h</sub> from 2.5 to 3.3 was used for the fits of the binding isotherms to estimate the value for K<sub>21</sub> (see below).

### Stabilization of FI<sup>+</sup> in the presence of CB[7].

The stabilization of FI<sup>+</sup> in the presence of CB[7] was studied by inducing a pH jump from pH 3 to pH 5.5. The same pattern of stabilization occurred as was observed at pH 4.3 (Fig. 2 in the paper), with a partial decrease of the absorbance of FI<sup>+</sup> in the presence of 12  $\mu\text{M}$  CB[7], and complete inhibition of the decomposition of FI<sup>+</sup> in the presence of 120  $\mu\text{M}$  CB[7] (Fig. S3).

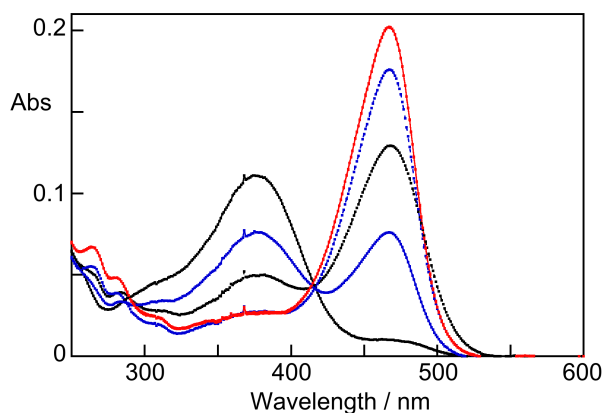

**Figure S3.** Absorption spectra of B-TMF (5  $\mu\text{M}$ ) at pH 5.5 immediately after addition of B-TMF (dashed lines) and after 7 h (solid lines) in the absence of CB[7] (black) and presence of 12  $\mu\text{M}$  (blue) and 120  $\mu\text{M}$  CB[7] (red, the dashed and solid lines are overlaid).

The stabilization of FI<sup>+</sup> by CB[7] was also investigated by fluorescence. The emission of FI<sup>+</sup> in water is weak and forms B, C<sub>z</sub> and C<sub>E</sub> of B-TMF do not fluoresce. Therefore, fluorescence is diagnostic for the presence of CB[7] complexes containing FI<sup>+</sup>. B-TMF was injected into aqueous solutions at pH 4.3 in the absence of CB[7] and in the presence of 12  $\mu\text{M}$  and 120  $\mu\text{M}$  CB[7] (Fig. S4). Immediately after the addition of B-TMF the weak emission of FI<sup>+</sup> in water was observed and the emission of FI<sup>+</sup> in the presence of both CB[7] concentrations was strong. After 30 min the emission for FI<sup>+</sup> in water and in the presence of 12  $\mu\text{M}$  CB[7] decreased compared to the emission in the presence of 120  $\mu\text{M}$  CB[7]. This trend continued for the measurements after 60 min of B-TMF addition. These results show that, at the highest CB[7] concentration, FI<sup>+</sup> is stabilized against hydration to form B.

A second experiment was performed in which B-TMF was added to an aqueous solution at pH 4.3 and was incubated for 3 h, after which 12  $\mu\text{M}$  or 120  $\mu\text{M}$  CB[7] were added to the solution. During the incubation period FI<sup>+</sup> was hydrated to form B and C<sub>z</sub>, and some C<sub>E</sub>. Fluorescence spectra right after the addition of CB[7] showed an increase in the emission intensity in the presence of 120  $\mu\text{M}$  of the host while only a modest increase was observed in the presence of 12  $\mu\text{M}$  of CB[7] (Fig. S5). The intensity in the presence of 120  $\mu\text{M}$  CB[7] increased further when the spectra were recorded after 80 min. This result shows that addition of CB[7] shifts the equilibrium from B to FI<sup>+</sup> and this shift is more prominent at the higher CB[7] concentration.

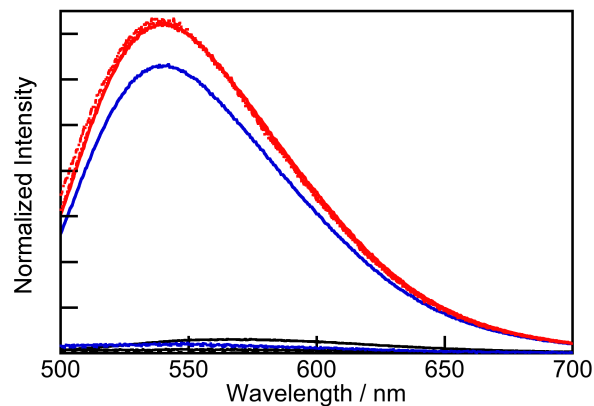

**Figure S4.** Fluorescence spectra for B-TMF ( $5 \mu\text{M}$ ) at pH 4.3 immediately after addition of B-TMF (solid lines) and after 30 or 60 min (dashed lines). All spectra in water and in the presence of  $12 \mu\text{M}$  CB[7] at 30 and 60 min have low intensities. The spectra in the presence of  $120 \mu\text{M}$  CB[7] were normalized at 541 nm (red). The intensities for B-TMF in water (black) and in the presence of  $12 \mu\text{M}$  CB[7] (blue) are relative to the normalized intensity in the presence of  $120 \mu\text{M}$  CB[7].

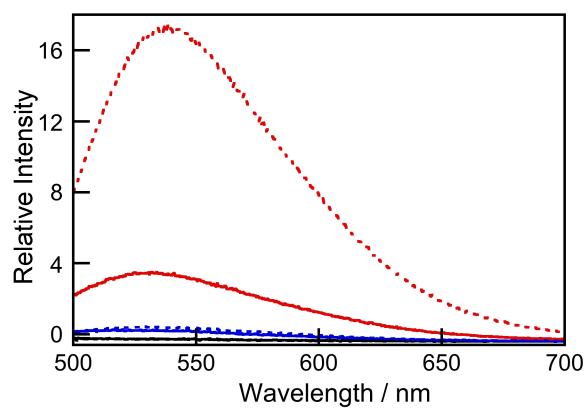

**Figure S5.** Fluorescence spectra for a solution of B-TMF ( $5 \mu\text{M}$ ) initially incubated for 3 h in water at pH 4.3 (black) followed by the addition of  $12 \mu\text{M}$  (blue) or  $120 \mu\text{M}$  of CB[7] (red) recorded right after the addition of CB[7] (solid lines) and 80 min after the addition of CB[7] (dashed lines).

### Binding isotherms of B-TMF and MMF<sup>+</sup> with CB[7]

The fluorescence intensities of B-TMF and MMF<sup>+</sup> increased with increasing concentrations of CB[7] (Fig. S6).

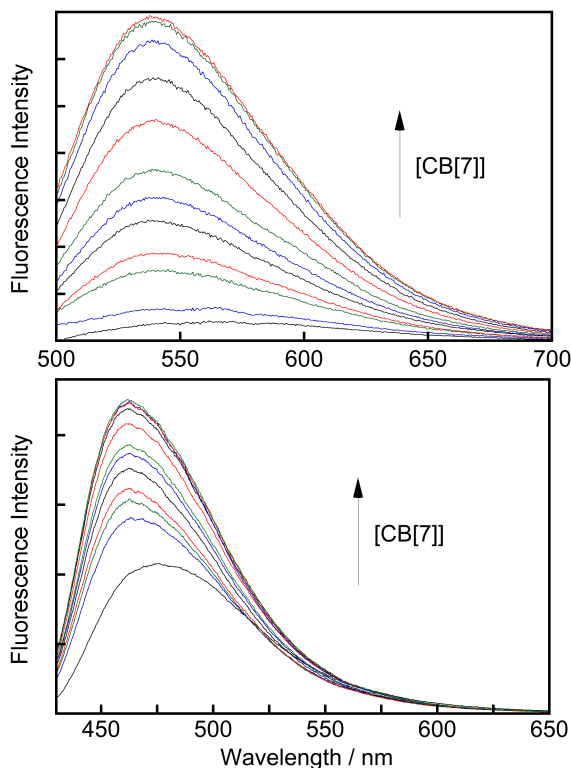

**Figure S6.** Top: Fluorescence spectra of B-TMF ( $0.2 \mu\text{M}$ ) in water ( $[\text{HCl}] = 1 \text{ mM}$ ) in the presence of different concentrations of CB[7] (from the bottom to the top: 0, 0.18, 0.54, 0.73, 1.1, 1.5, 2.0, 3.6, 7.2, 18, 34,  $78 \mu\text{M}$ ). Bottom: Fluorescence spectra of MMF<sup>+</sup> ( $0.2 \mu\text{M}$ ) in water ( $[\text{HCl}] = 1 \text{ mM}$ ) in the presence of different concentrations of CB[7] (from the bottom to the top: 0, 0.23, 0.46, 0.68, 0.91, 1.1, 1.4, 2.1, 3.6, 6.8, 13 and  $22 \mu\text{M}$ ).

The model used for the analysis for the binding of B-TMF with CB[7] includes the  $pK_{\text{ap}}$  value (see above), because in the presence of 1.0 mM HCl, B-TMF is present as a 1:1 mixture between  $\text{Fl}^+$  and the sum of B,  $C_E$  and  $C_Z$ . The solution was at equilibrium between  $\text{Fl}^+$ , and B,  $C_E$  and  $C_Z$  at the start of the binding isotherm studies. The fluorescence intensity was measured after sequential injections of the CB[7] stock solution into the cell containing B-TMF. The sample was kept in the sample holder of the fluorimeter to achieve the required temperature after each injection and, during this time, the equilibrium between  $\text{Fl}^+$  and B was established; the contribution due to the changes in concentrations of  $C_E$  and  $C_Z$  was considered to be minor. Therefore, the model employed assumed a constant  $\text{Fl}^+ / (\text{B} + C_E + C_Z)$  ratio in water.



The binding isotherm for B-TMF with CB[7] did not fit to a model assuming a 1:1 binding stoichiometry (Fig. 5 in the paper), but an adequate fit was obtained when assuming sequential 1:1 and 1:2 B-TMF:CB[7] stoichiometries. Nonetheless, the errors in the best-fit values of  $K_{11}$  and  $K_{12}$  were large because the difference in the emission quantum yields of B-TMF in the 1:1 and 1:2 complexes was small. These quantum yields are unknown and therefore could not be fixed in the numerical fit. The value for  $K_{11}$  recovered from the kinetic studies ( $1.5 \times 10^6 \text{ M}^{-1}$ ) was fixed and a fit with good residuals was obtained (Fig. 5 in the paper). The results were qualitatively the same when  $\text{p}K_{\text{ap}}$  values of 2.5, 3.0 or 3.3 were employed in the sense of obtaining poor fits for a 1:1 stoichiometry and good fits when 1:1 and 1:2 complexes were assumed to be present. The value for  $K_{12}$  was estimated to be lower than  $3 \times 10^4 \text{ M}^{-1}$ .

Numerical fits of the isotherm for the binding of  $\text{MMF}^+$  with CB[7] showed systematic deviations when a 1:1 complexation stoichiometry was assumed (Fig. S7), while the fit for the sequential formation of 1:1 and 1:2  $\text{MMF}^+:\text{CB}[7]$  complexes was adequate. The recovered values for the sequential mechanism were  $(9 \pm 2) \times 10^5 \text{ M}^{-1}$  for  $K_{11}$  and  $(8 \pm 5) \times 10^5 \text{ M}^{-1}$  for  $K_{12}$ .

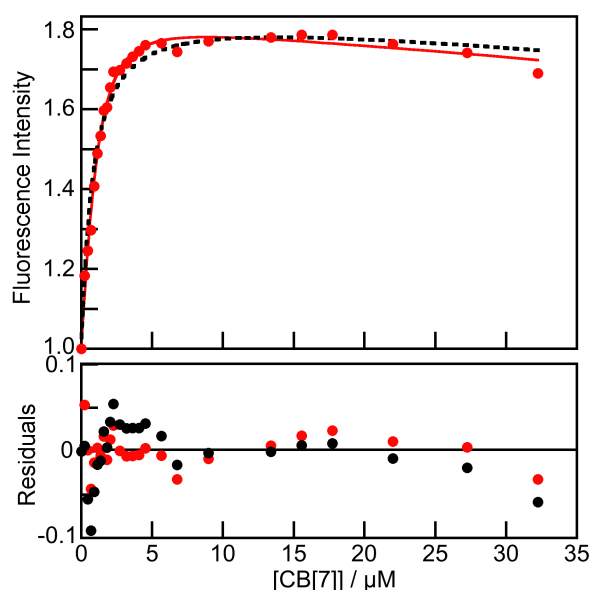

**Figure S7.** Top: Fit of the binding isotherm for  $\text{MMF}^+$  ( $0.2 \mu\text{M}$ ) with CB[7] to a 1:1 stoichiometry (black, dashed line) and to sequential 1:1 and 1:2  $\text{MMF}^+:\text{CB}[7]$  stoichiometries (red, solid line). Bottom: residuals between the data and calculated values for the fit assuming a 1:1 stoichiometry (black) and sequential 1:1 and 1:2 stoichiometries (red).

## References.

1. J. C. Lima, I. Abreu, R. Brouillard and A. L. Maçanita, Kinetics of ultra-fast excited state proton transfer from 7-hydroxy-4-methylflavylium chloride to water, *Chem. Phys. Letters*, 1998, **298**, 189-195.
2. A. Robertson and R. Robinson, CCXXV. Experiments on the Synthesis of Anthocyanins, *J. Chem. Soc.*, 1926, 1713-1720.

3. D. D. Pratt and R. Robinson, CLXXXVIII. A Synthesis of Pirylium Salts of Anthocyanidin Type, *J. Chem. Soc. Trans.*, 1922, 1577-1585.
4. J. Kim, I.-S. Jung, S.-Y. Kim, E. Lee, J.-K. Kang, S. Sakamoto, K. Yamaguchi and K. Kim, New Cucurbituril Homologues: Syntheses, Isolation, Characterization, and X-ray Crystal Structures of Cucurbit[n]uril (n = 5, 7, and 8), *J. Am. Chem. Soc.*, 2000, **122**, 540-541.
5. A. Day, A. P. Arnold, R. J. Blanch and B. Snushall, Controlling Factors in the Synthesis of Cucurbituril and Its Homologues, *J. Org. Chem.*, 2001, **66**, 8094-8100.
6. C. Marquez, F. Huang and W. M. Nau, Cucurbiturils: Molecular Nanocapsules for Time-Resolved Fluorescence-Based Assays, *IEEE Trans. Nanobiosci.*, 2004, **3**, 39-45.
7. S. Yi and A. E. Kaifer, Determination of the Purity of Cucurbit[n]uril (n = 7, 8) Host Samples, *J. Org. Chem.*, 2011, **76**, 10275-10278.
